# Supplementary material
Source: PubMed Central journal article supplement (PMC4696921)
Supplement: NIHMS693320-supplement-Supp_MaterialS1.pdf [file NIHMS693320-supplement-Supp_MaterialS1.pdf]

**Supplemental File S1. Shuar sample sizes distributed by age, sex, and measure of interest**

| Age (years)    | Males             |              |              |             | Females           |              |              |             |
|----------------|-------------------|--------------|--------------|-------------|-------------------|--------------|--------------|-------------|
|                | $N_{Individuals}$ | $n_{Height}$ | $n_{Weight}$ | $n_{BMI}$   | $N_{Individuals}$ | $n_{Height}$ | $n_{Weight}$ | $n_{BMI}$   |
| 0.00-0.99      | 72                | 64           | 179          | 63          | 80                | 104          | 225          | 101         |
| 1.00-1.99      | 79                | 77           | 239          | 75          | 77                | 96           | 276          | 96          |
| 2.00-2.99      | 72                | 62           | 154          | 65          | 76                | 67           | 177          | 66          |
| 3.00-3.99      | 65                | 47           | 111          | 47          | 70                | 80           | 171          | 82          |
| 4.00-4.99      | 72                | 62           | 110          | 61          | 82                | 70           | 127          | 69          |
| 5.00-5.99      | 121               | 121          | 145          | 122         | 145               | 157          | 180          | 152         |
| 6.00-6.99      | 150               | 165          | 175          | 164         | 158               | 173          | 183          | 170         |
| 7.00-7.99      | 157               | 178          | 187          | 177         | 148               | 165          | 170          | 163         |
| 8.00-8.99      | 144               | 156          | 160          | 155         | 155               | 179          | 181          | 174         |
| 9.00-9.99      | 140               | 151          | 162          | 150         | 132               | 148          | 151          | 146         |
| 10.00-10.99    | 130               | 137          | 147          | 139         | 123               | 134          | 137          | 133         |
| 11.00-11.99    | 102               | 112          | 114          | 109         | 96                | 107          | 110          | 103         |
| 12.00-12.99    | 75                | 86           | 88           | 84          | 78                | 84           | 88           | 82          |
| 13.00-13.99    | 60                | 71           | 71           | 71          | 55                | 53           | 66           | 53          |
| 14.00-14.99    | 28                | 36           | 36           | 36          | 39                | 40           | 49           | 39          |
| 15.00-15.99    | 16                | 18           | 18           | 17          | 34                | 38           | 41           | 35          |
| 16.00-16.99    | 11                | 11           | 12           | 11          | 20                | 17           | 29           | 19          |
| 17.00-17.99    | 9                 | 11           | 12           | 11          | 26                | 27           | 41           | 29          |
| 18.00-18.99    | 5                 | 6            | 7            | 6           | 23                | 21           | 34           | 21          |
| 19.00-19.99    | 5                 | 7            | 8            | 7           | 19                | 22           | 29           | 21          |
| 20.00-20.99    | 6                 | 7            | 8            | 7           | 15                | 16           | 22           | 16          |
| 21.00-21.99    | 7                 | 7            | 9            | 7           | 14                | 19           | 22           | 19          |
| 22.00-22.99    | 3                 | 2            | 4            | 2           | 10                | 10           | 12           | 10          |
| 23.00-23.99    | 4                 | 4            | 4            | 4           | 15                | 16           | 23           | 16          |
| 24.00-24.99    | 9                 | 12           | 13           | 13          | 15                | 17           | 21           | 15          |
| 25.00-25.99    | 6                 | 6            | 6            | 6           | 11                | 6            | 14           | 6           |
| 26.00-26.99    | 7                 | 6            | 9            | 6           | 15                | 15           | 18           | 14          |
| 27.00-27.99    | 7                 | 7            | 9            | 7           | 16                | 19           | 27           | 19          |
| 28.00-28.99    | 6                 | 7            | 7            | 7           | 13                | 15           | 20           | 15          |
| 29.00-29.99    | 7                 | 9            | 10           | 9           | 13                | 12           | 19           | 12          |
| <b>Totals*</b> | <b>1188</b>       | <b>1646</b>  | <b>2216</b>  | <b>1638</b> | <b>1259</b>       | <b>1927</b>  | <b>2662</b>  | <b>1896</b> |

$N_{Individuals}$  = number of participants measured;  $n_{measure}$  = number of recorded observations. \*The mixed-longitudinal nature of the data results in the inclusion of some individuals in multiple age groups.
